# Supplementary material for: Expression, Purification, and Refolding of Chikungunya Virus Full-Length Envelope E2 Protein along with B-Cell and T-Cell Epitope Analyses Using Immuno-Informatics Approaches
Source: PubMed Central journal article supplement — ACS Omega. 2022 Jan 14;7(4):3491–513. doi: 10.1021/acsomega.1c05975 (PMC8811930; doi:10.1021/acsomega.1c05975), 2022-01-14

**Expression, purification and refolding of Chikungunya virus full length envelope E2 protein along with B-cell and T-cell epitope analysis using immuno-informatics approaches**

Manisha Shukla<sup>1</sup>, Pankaj Chandley<sup>1</sup>, Suman Tapryal<sup>2</sup>, Narendra Kumar<sup>3</sup>, Sulakshana P. Mukherjee<sup>1</sup>, and Soma Rohatgi<sup>1\*</sup>

<sup>1</sup> Department of Biosciences and Bioengineering, Indian Institute of Technology Roorkee, Roorkee, 247667, Uttarakhand, India.

<sup>2</sup> Central University of Rajasthan

<sup>3</sup> Jaypee University of Information Technology, Wagnaghat, Solan, India

\* Address correspondence to Soma Rohatgi, [soma.rohatgi@bt.iitr.ac.in](mailto:soma.rohatgi@bt.iitr.ac.in)

## Supporting Information

Figure S1. FTIR spectra of unfolded CHIKV E2 full length and truncated protein samples. (A) E2-FL (1-423 aa), (B) E2- $\Delta$ C (1-365 aa) and (C) E2- $\Delta$ NC (35-365aa) protein samples.

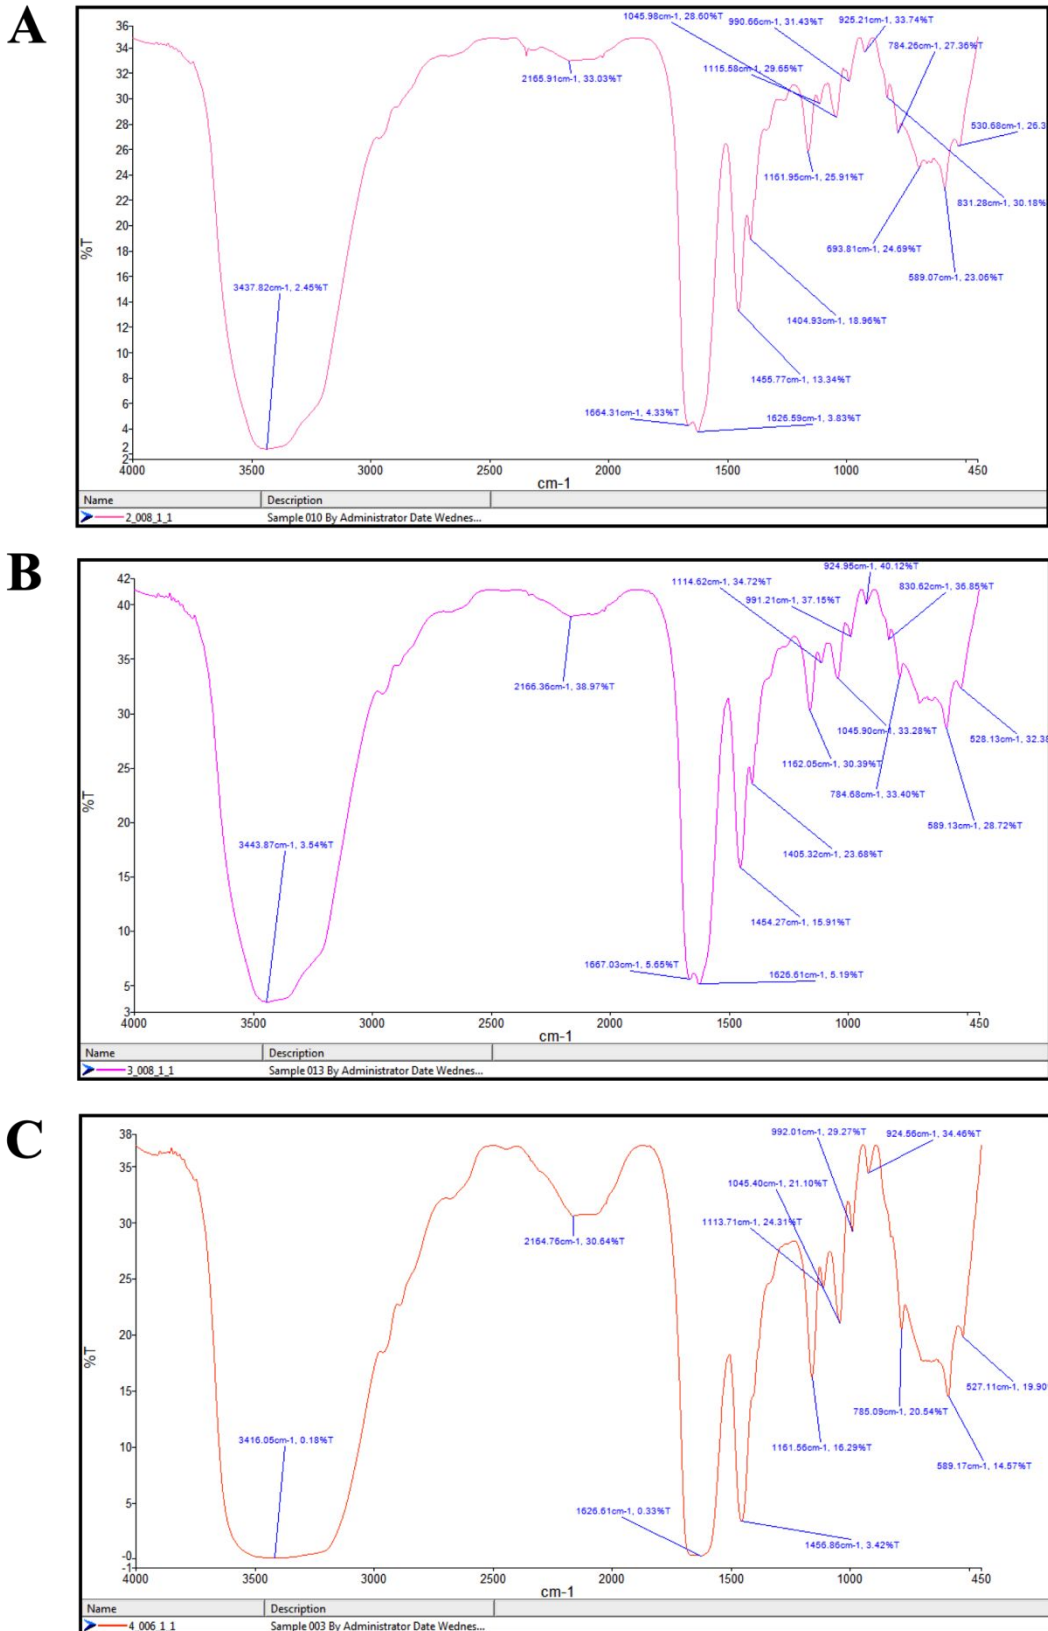

Supplement: ao1c05975_si_001.pdf [file ao1c05975_si_001.pdf]
